# Supplementary material for: Selective simultaneous determination of levodopa and acetaminophen in the presence of ascorbic acid using a novel TiO2hollow sphere/multi-walled carbon nanotube/poly-aspartic acid composite modified carbon paste electrode
Source: Royal Society of Chemistry journal article supplement (doi:10.1039/c5ay02497h), 2016-01-01
Supplement: c5ay02497h1.pdf [file c5ay02497h1.pdf]

### Supplementary Data

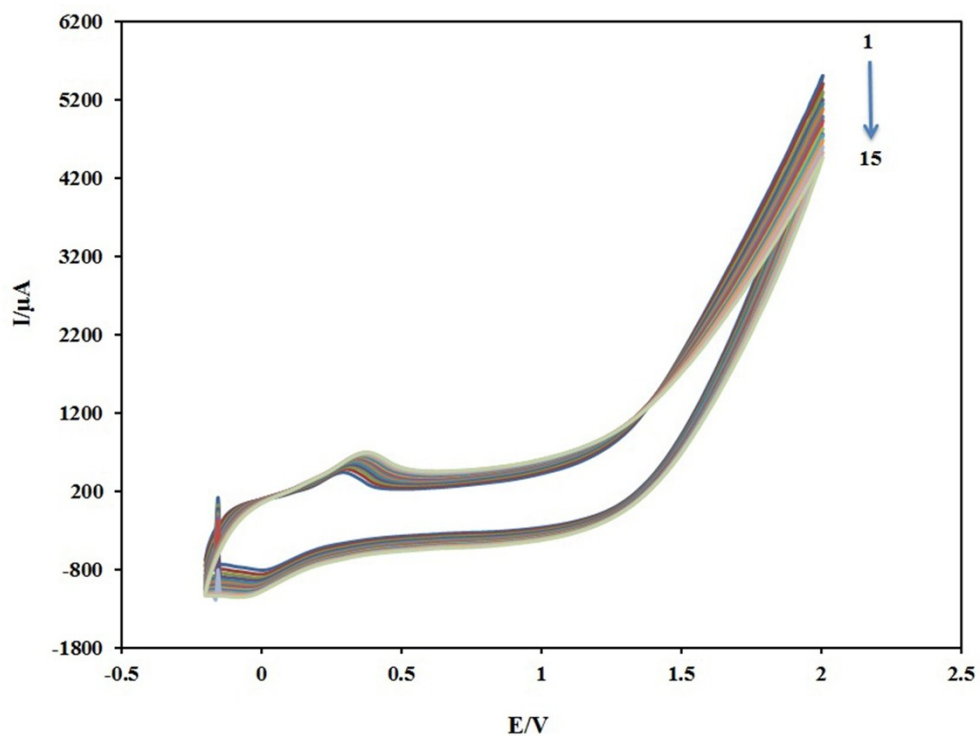

**Fig.S1.** Cyclic voltammograms of the electro-polymerization of Aspartic acid on TOHS/MWCNTs/CPE surface in 0.1 M PBS (pH 7.0) containing 0.05 M Aspartic acid in the potential range of  $-0.2$  to  $2.0$  V at  $100 \text{ mV}\cdot\text{s}^{-1}$  for 15 cycles.

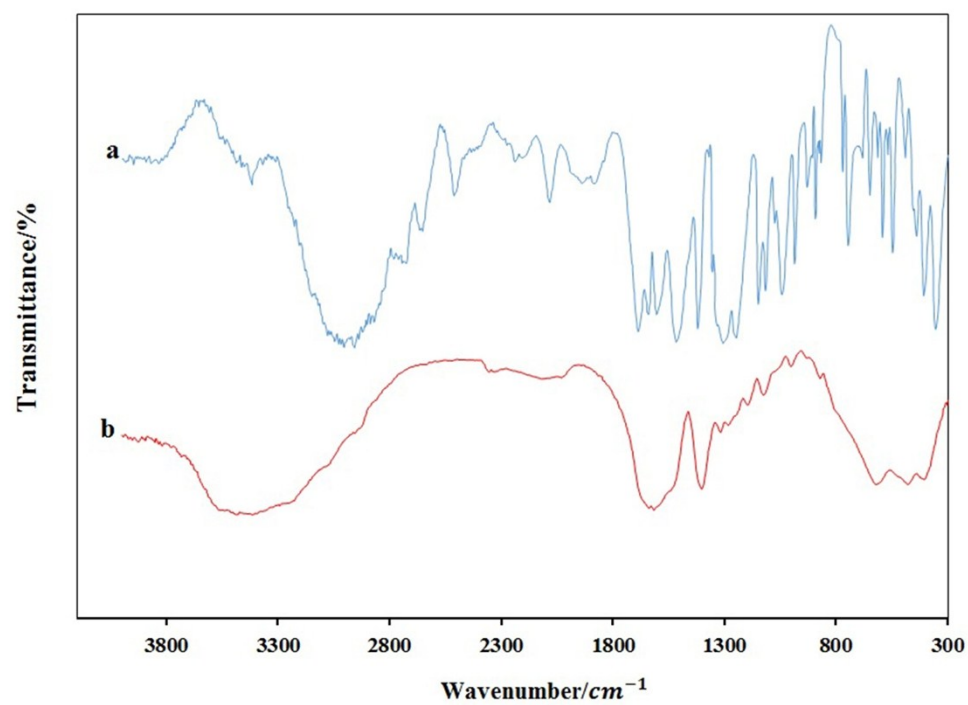

**Fig. S2.** The FTIR spectra of aspartic acid (a) and P-ASP film (b).

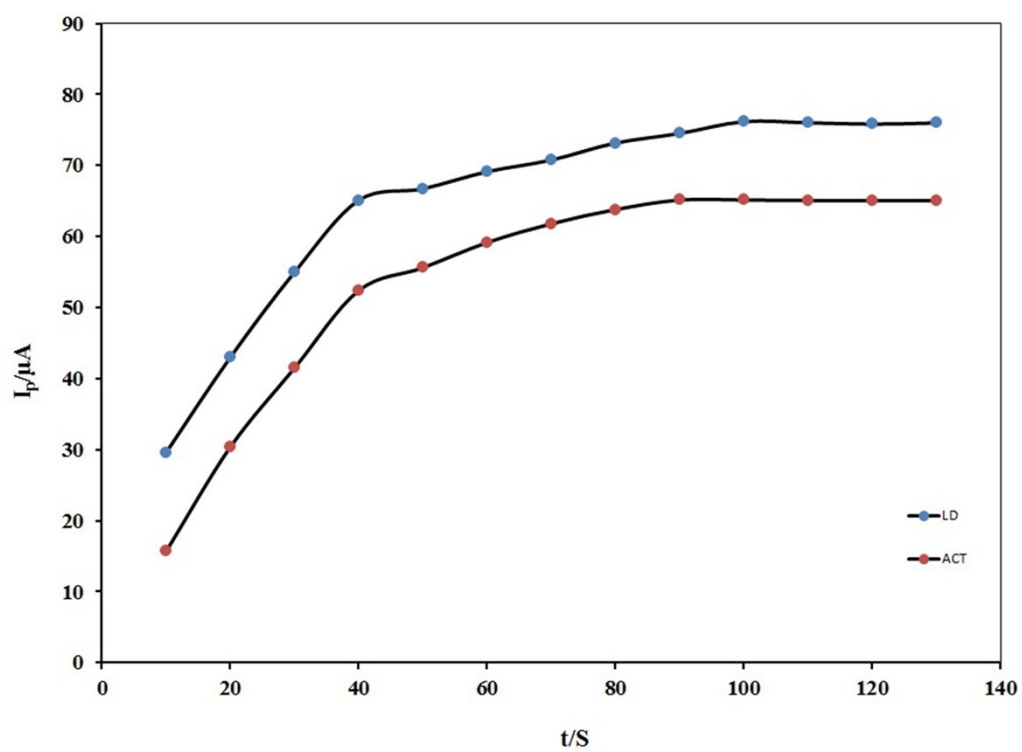

**Fig.S3.** The variations of differential pulse anodic peak currents of 150  $\mu M$  of LD and 50  $\mu M$  of ACT with respect to accumulation time.

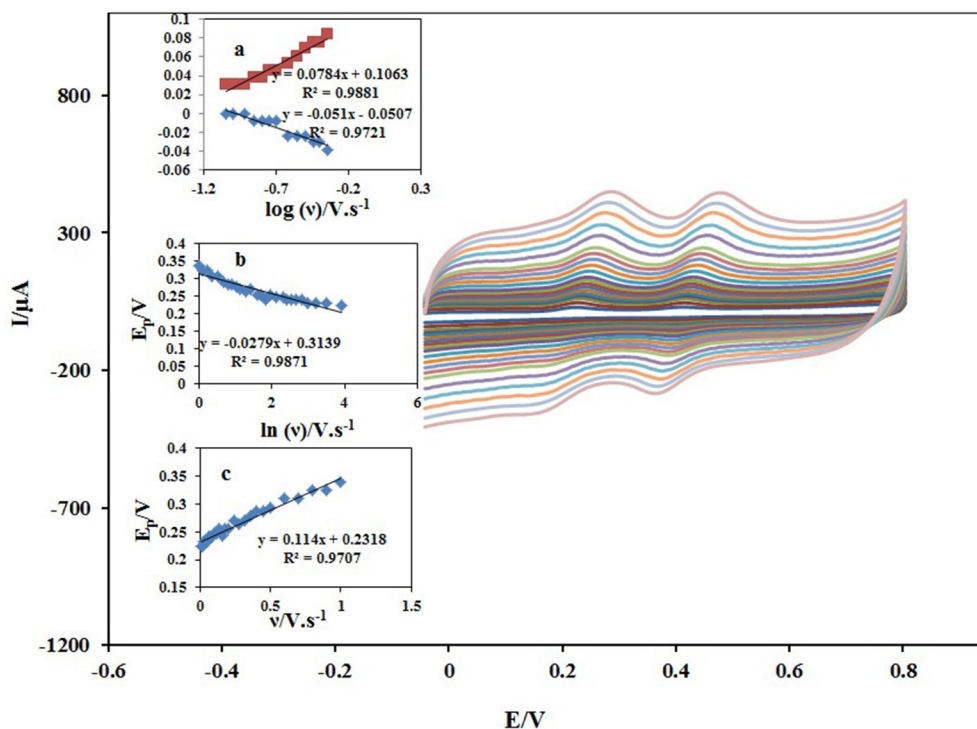

**Fig.S4.** Cyclic voltammograms 100  $\mu\text{M}$  LD and 50  $\mu\text{M}$  ACT at different scan rates (from inner to outer) 0.01, 0.02, 0.03, 0.04, 0.05, 0.06, 0.07, 0.08, 0.09, 0.1, 0.12, 0.14, 0.16, 0.18, 0.2, 0.24, 0.28, 0.32, 0.36, 0.4  $\text{V.s}^{-1}$ . Insets: (a) peak separations ( $\Delta E_p$ ) for ACT as a function of  $\log(v)$ , (b) peak potential for LD as a function of  $\ln(v)$  and (c) peak potential for LD as a function of  $\ln(v)$ .
